# Supplementary material for: Discovery of an NAD+ analogue with enhanced specificity for PARP1
Source: Royal Society of Chemistry journal article supplement (doi:10.1039/d1sc06256e), 2022-01-01
Supplement: d1sc06256e2.xlsx [file d1sc06256e2.xlsx]

## Sheet: Sheet1
Table S1. List of identified nuclear substrate proteins for PARP1 in HEK293T cell lysates.
Gene Name	Description	MW (kDa)
ALYREF	THO complex subunit 4	27.5
ANP32A	Acidic leucine-rich nuclear phosphoprotein 32 family member A	28.6
APEX1	DNA-(apurinic or apyrimidinic site) lyase	35.5
CPSF6	Cleavage and polyadenylation specificity factor subunit 6	59.2
DDB1	DNA damage-binding protein 1	126.9
DDX17	Probable ATP-dependent RNA helicase DDX17	80.4
DDX39B	Spliceosome RNA helicase DDX39B	49
DDX3X	ATP-dependent RNA helicase DDX3X	81.4
EIF5A	Eukaryotic translation initiation factor 5A-1	20.5
G3BP1	Ras GTPase-activating protein-binding protein 1	52.1
HDAC2	Histone deacetylase 2	55.3
HDLBP	High density lipoprotein binding protein (Vigilin), isoform CRA_a	141.4
HIST1H1D	Histone H1.3	22.3
HIST1H2BN	Histone H2B	18.8
HIST1H4A	Histone H4	11.4
HMGA1	High mobility group protein HMG-I/HMG-Y	11.7
HMGA2	High mobility group protein HMGI-C	16.4
HNRNPA0	Heterogeneous nuclear ribonucleoprotein A0	30.8
HNRNPAB	Heterogeneous nuclear ribonucleoprotein A/B	35.7
HNRNPC	Heterogeneous nuclear ribonucleoproteins C1/C2	33.7
HNRNPD	Heterogeneous nuclear ribonucleoprotein D0	38.4
HNRNPDL	Heterogeneous nuclear ribonucleoprotein D-like	46.4
HNRNPF	Heterogeneous nuclear ribonucleoprotein F	45.6
HNRNPH3	Heterogeneous nuclear ribonucleoprotein H3	36.9
HNRNPM	Heterogeneous nuclear ribonucleoprotein M	77.5
HUWE1	E3 ubiquitin-protein ligase HUWE1	481.6
IGF2BP1	Insulin-like growth factor 2 mRNA-binding protein 1	63.4
ILF2	Interleukin enhancer-binding factor 2	43
LBR	Lamin-B receptor	70.7
LRPPRC	Leucine-rich PPR motif-containing protein, mitochondrial	157.8
LUC7L2	Putative RNA-binding protein Luc7-like 2	54.2
MCM2	DNA replication licensing factor MCM2	101.8
MCM3	DNA replication licensing factor MCM3	91.9
MCM6	DNA replication licensing factor MCM6	92.8
NDRG1	Protein NDRG1	42.8
PA2G4	Proliferation-associated protein 2G4	43.8
PABPC1	Polyadenylate-binding protein 1	70.6
PARP1	Poly [ADP-ribose] polymerase 1	113
PCBP2	Poly(rC)-binding protein 2	38.6
PRKDC	DNA-dependent protein kinase catalytic subunit	468.8
PRMT1	Protein arginine N-methyltransferase 1	42.4
PSMD3	26S proteasome non-ATPase regulatory subunit 3	60.9
RPL10	60S ribosomal protein L10	24.6
RPL12	60S ribosomal protein L12	17.8
RPL22	60S ribosomal protein L22	14.8
RPL23	60S ribosomal protein L23	14.9
RPL23A	60S ribosomal protein L23a	17.7
RPL3	60S ribosomal protein L3	46.1
RPL30	60S ribosomal protein L30	12.8
RPL4	60S ribosomal protein L4	47.7
RPL5	60S ribosomal protein L5	34.3
RPL7	60S ribosomal protein L7	29.2
RPLP0	60S acidic ribosomal protein P0	34.3
RPS11	40S ribosomal protein S11	18.4
RPS14	40S ribosomal protein S14	16.3
RPS16	40S ribosomal protein S16	17.1
RPS2	40S ribosomal protein S2	31.3
RPS27A	Ubiquitin-40S ribosomal protein S27a	18
RPS3	40S ribosomal protein S3	26.7
RPS6	40S ribosomal protein S6	28.7
SERBP1	Plasminogen activator inhibitor 1 RNA-binding protein	44.9
SND1	Staphylococcal nuclease domain-containing protein 1	101.9
SRSF1	Serine/arginine-rich-splicing factor 1	28.3
SRSF3	Serine/arginine-rich splicing factor 3	19.3
SRSF7	Serine/arginine-rich splicing factor 7	27.4
STIP1	Stress-induced-phosphoprotein 1	62.6
STRAP	Serine-threonine kinase receptor-associated protein	38.4
SUB1	Activated RNA polymerase II transcriptional coactivator p15	14.4
TARDBP	TAR DNA-binding protein 43	44.7
TMPO	Lamina-associated polypeptide 2, isoforms beta/gamma	50.6
TMPO	Lamina-associated polypeptide 2, isoform alpha	75.5
XRCC5	X-ray repair cross-complementing protein 5	82.7
XRCC6	X-ray repair cross-complementing protein 6	69.8
Highlighted genes have been previously identified to be substrate proteins of human PARP1.
